# Supplementary material for: Hypermethylation of NDN promotes cell proliferation by activating the Wnt signaling pathway in colorectal cancer
Source: PubMed Central journal article supplement (PMC5542259; doi:10.18632/oncotarget.17580), 2017-05-03
Supplement: oncotarget-08-46191-s001.pdf [file oncotarget-08-46191-s001.pdf]

# Hypermethylation of NDN promotes cell proliferation by activating the Wnt signaling pathway in colorectal cancer

## SUPPLEMENTARY MATERIALS

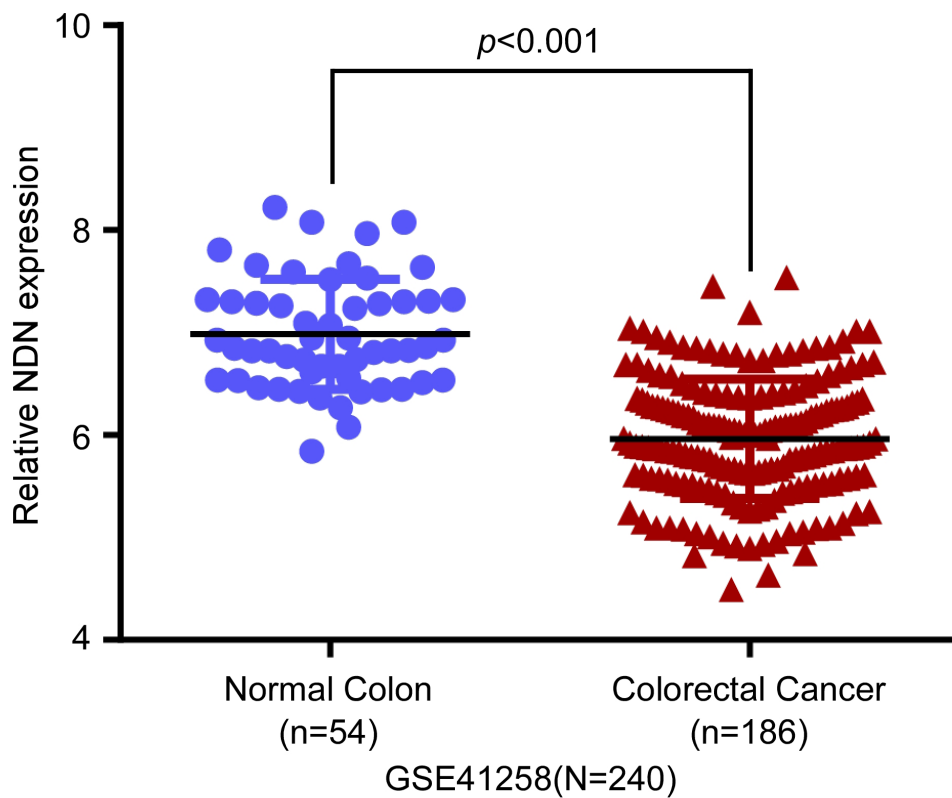

**Supplementary Figure 1: Analysis of NDN expression in CRC data from GEO.** Analysis of NDN expression in Gene Expression Omnibus (GEO, <http://www.ncbi.nlm.nih.gov/geo/>) data (GSE41258, n=240).

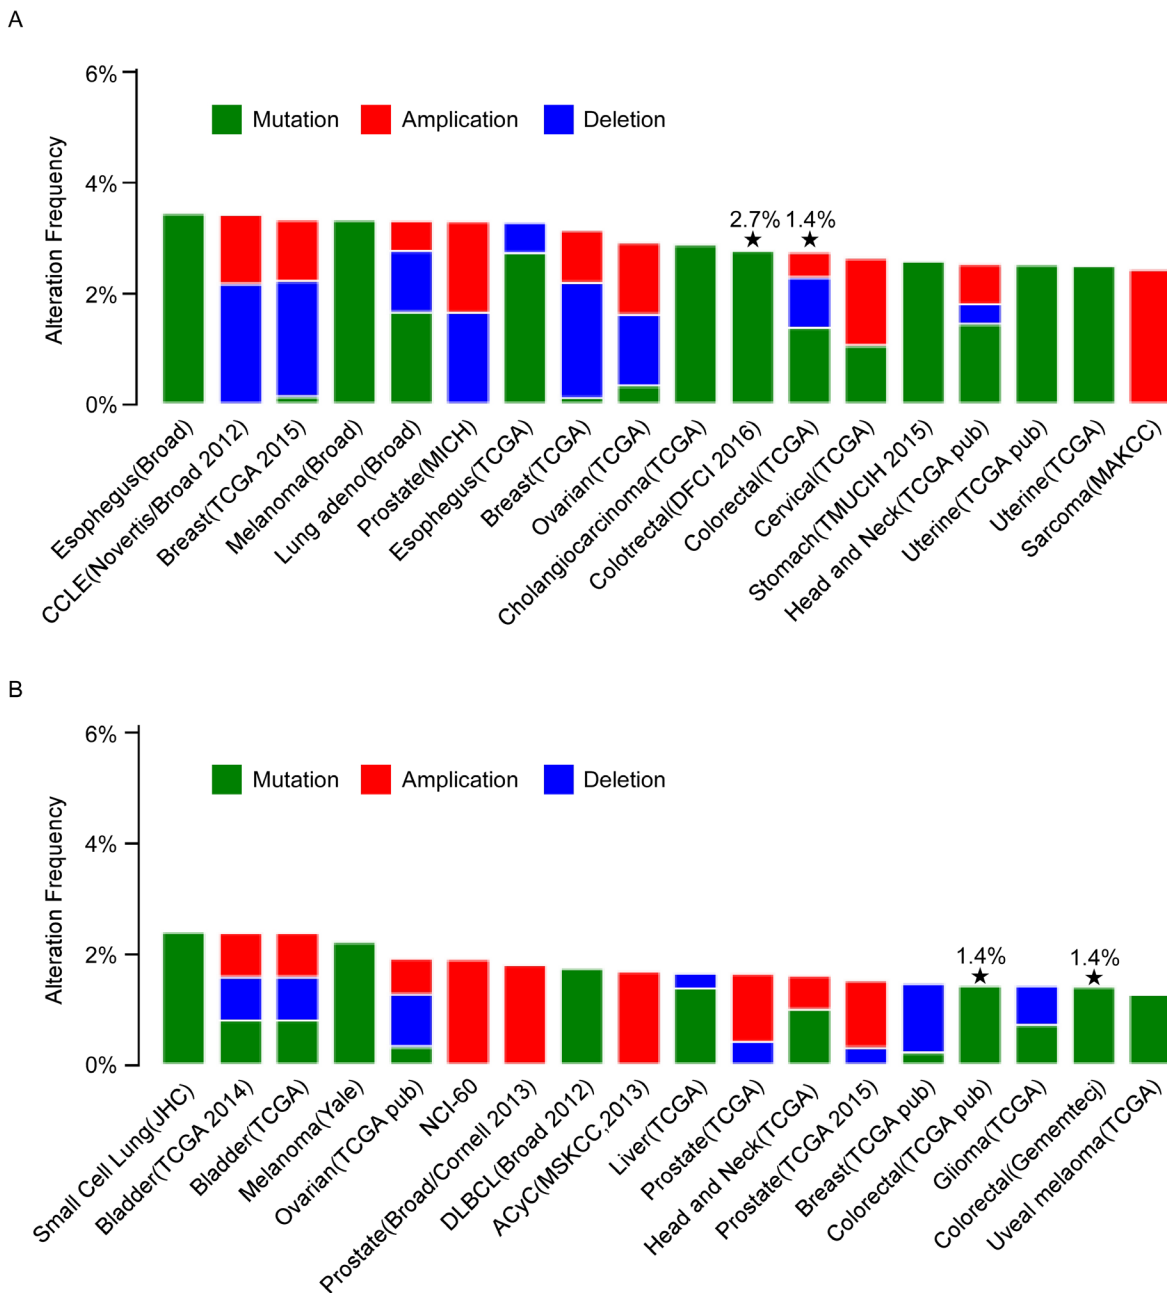

**Supplementary Figure 2: Analysis of NDN mutation in CRC using cBioportal for Cancer Genomics.** Analysis of NDN mutation in CRC using cBioPortal for Cancer Genomics (<http://www.cbioportal.org/>).

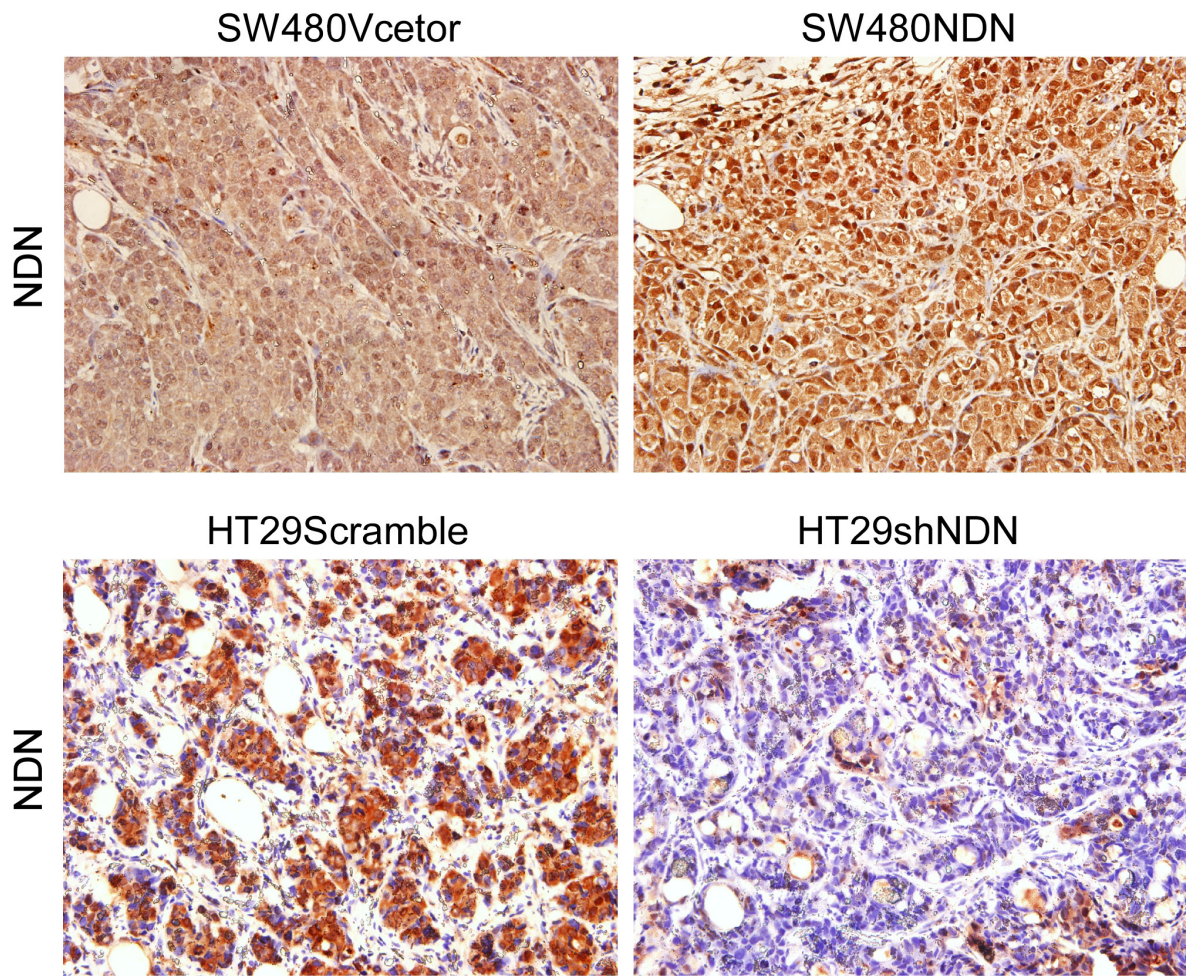

**Supplementary Figure 3: NDN expression in the xenograft tumors.** NDN expression was tested in the xenograft tumors using IHC.

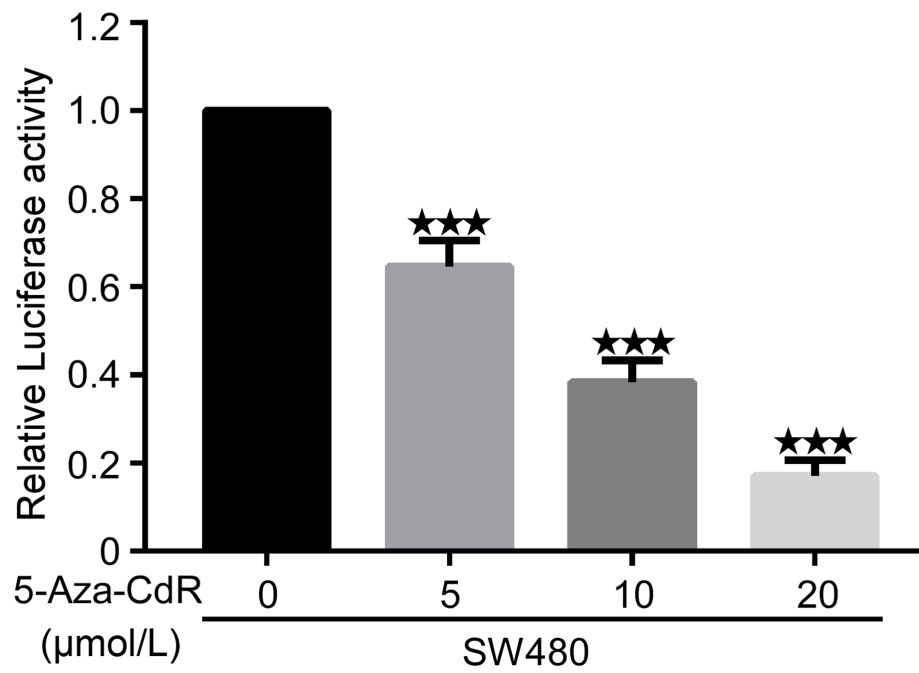

**Supplementary Figure 4: The increased demethylation correlates with decreased Wnt signaling in CRC cells.** The Wnt signaling luciferase reporter assay of the indicated cells treated with the demethylating agent 5-Aza-CdR.

**Supplementary Table 1: Primer sequences used for qRT-PCR (5' to 3')**

| <b>Gene</b> | <b>Forward primer</b>  | <b>Reverse primer</b>  |
|-------------|------------------------|------------------------|
| NDN         | CGCGAAATCACCAAGATGC    | AGACACTGCTGCGAGGGTAG   |
| CyclinD1    | GCGAGGAACAGAAGTGCG     | TGGAGTTGTCGGTGTAGATGC  |
| p21         | TGGCACCTCACCTGCTCTG    | CGGCGTTTGGAGTGGTAGAA   |
| p27         | GGCTCCGGCTAACTCTGA     | TCTTCTGTTCTGTTGGCTCTTT |
| GAPDH       | GACTCATGACCACAGTCCATGC | AGAGGCAGGGATGATGTTCTG  |

**Supplementary Table 2: Multivariate analyses of various prognosis parameters in 84 CRC patients using Cox Regression model**

| Variable  | Category | No. patients | Multivariate analyses |               |             |
|-----------|----------|--------------|-----------------------|---------------|-------------|
|           |          |              | P                     | Relative risk | 95%CI       |
| NDN       | Low      | 42           | 0.048                 | 2.172         | 1.008-4.679 |
|           | High     | 42           |                       |               |             |
| TNM stage | I-II     | 32           | 0.005                 | 0.179         | 0.054-0.591 |
|           | III-IV   | 52           |                       |               |             |

SE: standard error; RR: relative risk; CI: confidence interval.

**Supplementary Table 3: Primer sequences used for amplification and plasmid construction (5' to 3')**

| <b>Gene</b> | <b>Forward primer</b>         | <b>Reverse primer</b>          |
|-------------|-------------------------------|--------------------------------|
| NDN(P1)     | AGGGAGCGCAGGCTCGAAGA          | GCGAAAGCACCAACCAAG             |
| NDN(P2)     | CGCGGATCCATGTCAGAACAAAGTAAGGA | CTAGACTAGTCTAGTCCTCAGAGACACTGC |

**Supplementary Table 4: Sequences used for the knockdown of genes (5' to 3')**

| Gene       | Sequence              |
|------------|-----------------------|
| NDN shRNA  | CGCACGAGCUCAUGUGGUA   |
| LRP6 shRNA | GAGAAUGCUACGAUUGUAGTT |



**Supplementary Table 5: Primer sequences used for ChIP analysis of the binding between NDN and the LRP6 promoter (5' to 3')**

|          | <b>Forward primer</b> | <b>Reverse primer</b>  |
|----------|-----------------------|------------------------|
| Primer 1 | ATTGTCCTTTGCTCTTAGGTT | GCTTTCAGCGTGGATCTGGT   |
| Primer 2 | GCCGAGCCGCAGAAAGTA    | GGCGAACTGGGAGGGAAA     |
| Primer 3 | GCCGGTCCGGGAAAGAAT    | AGGGAAGGGAGTCGGCAACC   |
| Primer 4 | GGCTTTCCTCCCAGTTCG    | ATACGGTCGGCACCGCCTCCTA |
| Primer 5 | GACCCTAGGAGGCGGTGC    | AAAGGGGCACGTCAAGGT     |
